# Supplementary material for: Folate-conjugated Fe3O4@SiO2@gold nanorods@mesoporous SiO2 hybrid nanomaterial: a theranostic agent for magnetic resonance imaging and photothermal therapy
Source: Royal Society of Chemistry journal article supplement (doi:10.1039/c3tb20090f), 2013-01-01
Supplement: c3tb20090f.pdf [file c3tb20090f.pdf]

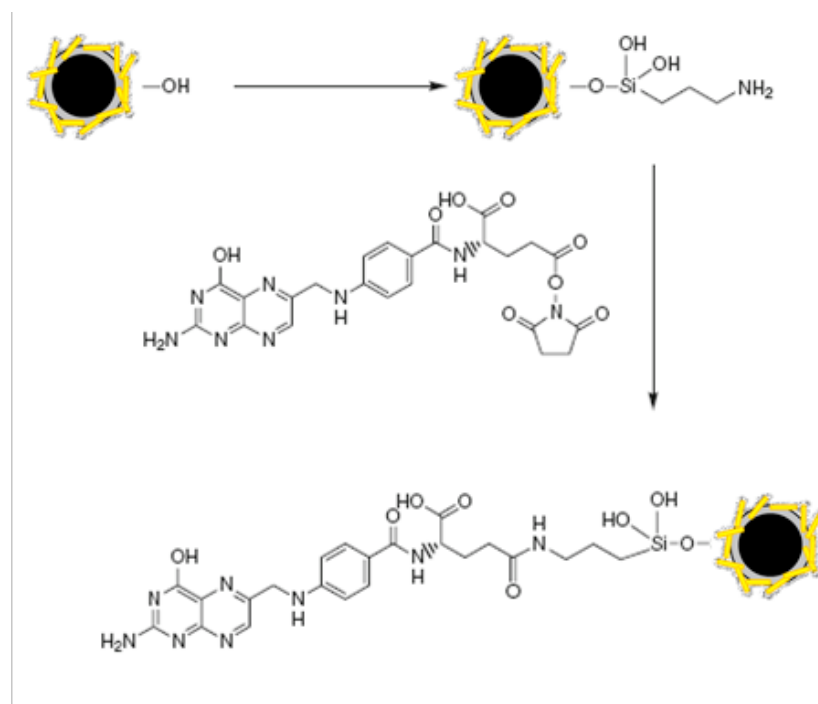

**Figure S1.** Scheme of the immobilization folic acid molecules on the  $\text{Fe}_3\text{O}_4@\text{SiO}_2@\text{GNRs}@\text{mSiO}_2$  surfaces.

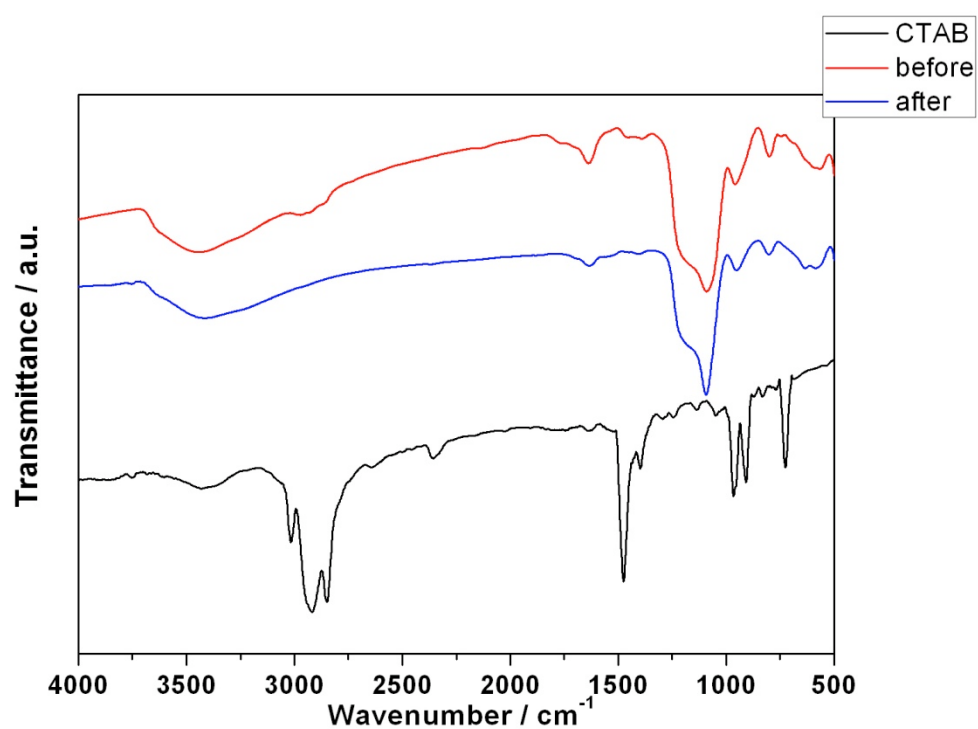

**Figure S2.** FTIR spectra of CTAB show two intense bands at 2918  $\text{cm}^{-1}$  and 2850  $\text{cm}^{-1}$ , assigned to asymmetric and symmetric stretching vibrations of  $\text{C}-\text{CH}_2$  in the methylene chains. After repeat reflux in acetone for 48 h, these two peaks disappeared in the FTIR spectra, indicating the completely remove of CTAB molecules.

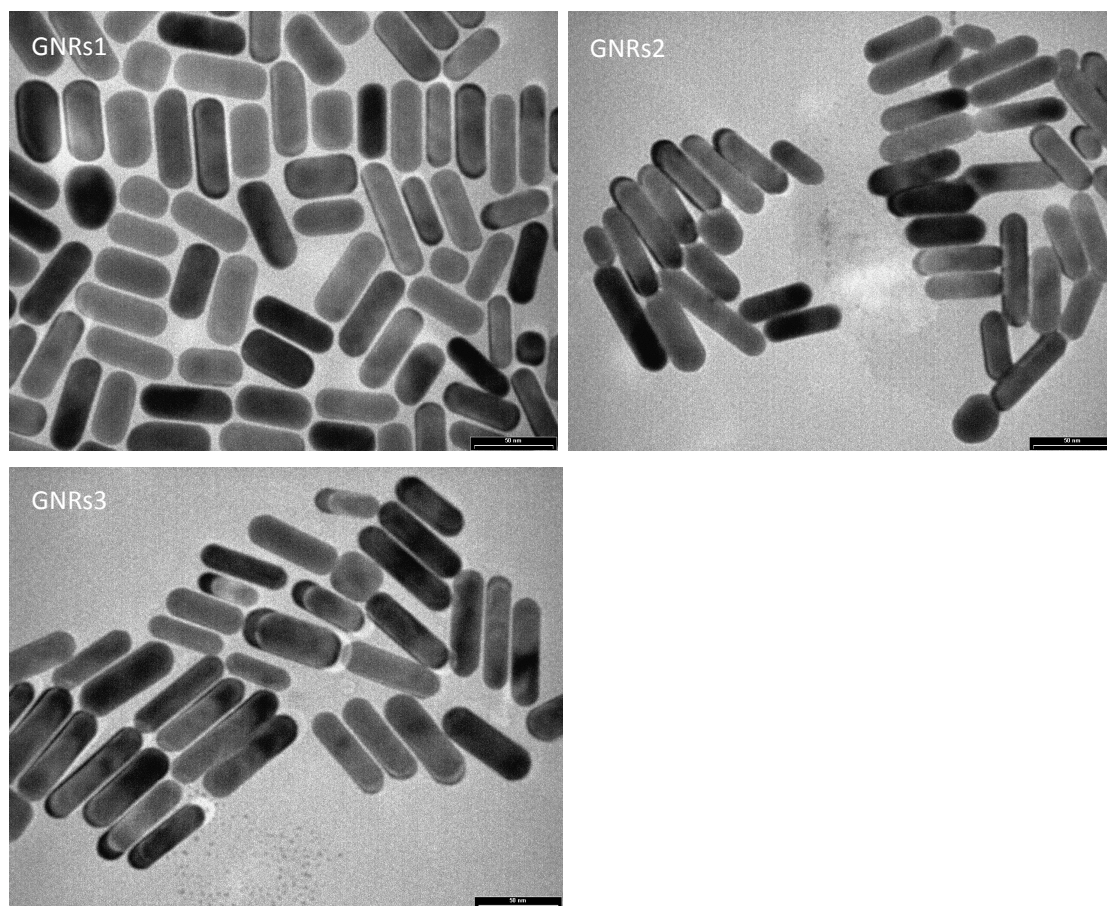

**Figure S3.** TEM images of GNRs 1, 2 and 3 (scale bar: 50 nm).

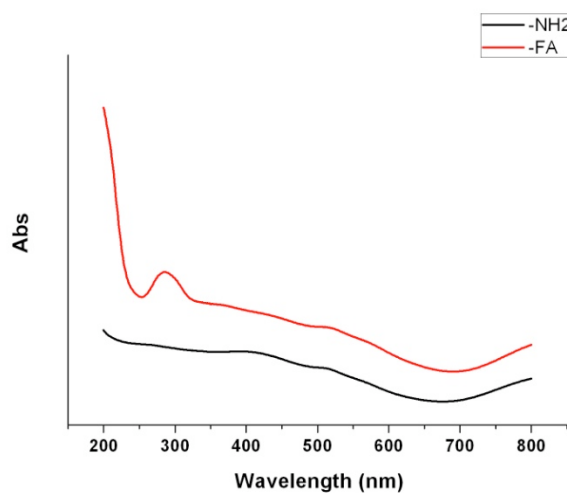

**Figure S4.** UV-vis spectra of  $\text{Fe}_3\text{O}_4@\text{SiO}_2@\text{GNRs}@m\text{SiO}_2$  before and after FA modification.

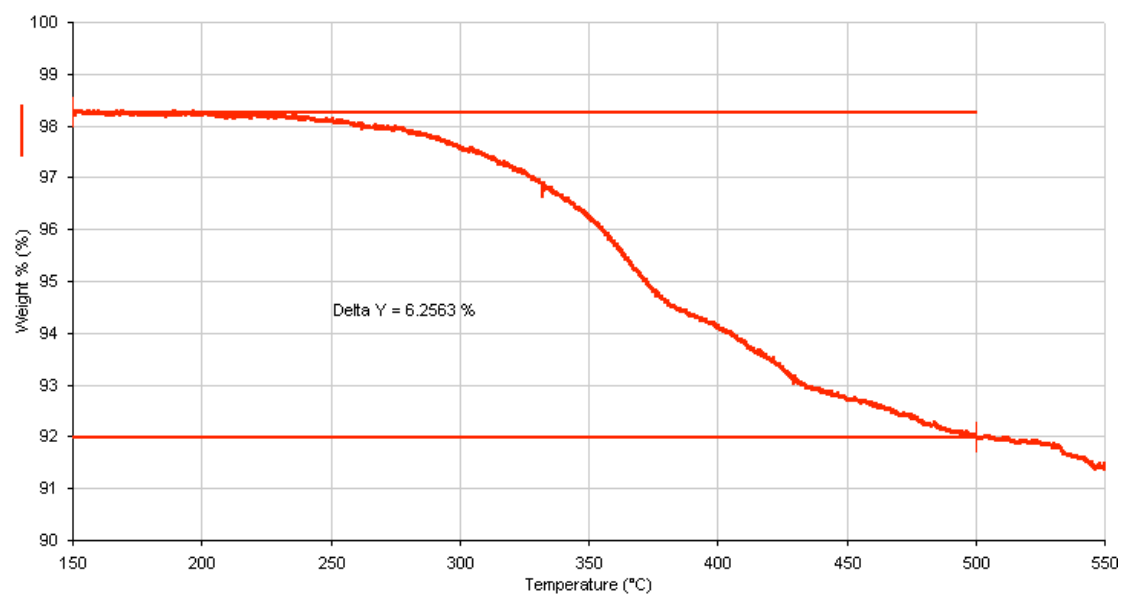

**Figure S5.** Thermogravimetric analysis (TGA) result of the  $\text{Fe}_3\text{O}_4@\text{SiO}_2@\text{GNRs}@\text{mSiO}_2\text{-FA}$  hybrid nanocomposites.
